# Supplementary material for: Rapid synthesis of vertically aligned α-MoO3 nanostructures on substrates
Source: Royal Society of Chemistry journal article supplement (doi:10.1039/d0ra01281e), 2020-01-01
Supplement: d0ra01281e1.pdf [file d0ra01281e1.pdf]

## Supporting Information

### Rapid Synthesis of Vertically Aligned $\alpha$ -MoO<sub>3</sub> Nanostructures on Substrates

*Sohaila Z. Noby,<sup>\*a,b</sup> Ka Kan Wong,<sup>a</sup> R. Ananthakumar,<sup>c</sup> Stephan Siroky,<sup>d</sup> M. Hagner,<sup>a</sup>*

*Klaus Boldt,<sup>e</sup> Lukas Schmidt-Mende<sup>\*a</sup>*

<sup>a</sup>*University of Konstanz, Department of Physics, 78457 Konstanz, Germany*

<sup>b</sup>*National Research centre NRC, Department of solid state of physics, 12622 Cairo, Egypt*

<sup>c</sup>*SARP-LARPM, Central Institute of Plastic Engineering and Technology (CIPET), 751024  
Bhubaneswar, India*

<sup>d</sup>*University of Konstanz, Department of Chemistry, 78457 Konstanz, Germany*

<sup>e</sup>*University of Konstanz, Department of Chemistry & Zukunftskolleg, 78457 Konstanz,  
Germany*

**Table 1.** Lattice parameters of the substrates and the adhesive formed layer of Cr oxides for the calculation of the lattice mismatch.

| Material                       | a (Å) | b (Å) | c (Å)  | Ref. Card   |
|--------------------------------|-------|-------|--------|-------------|
| FTO (substrate)                | 4.737 | 4.737 | 3.186  | 00-77-0447  |
| SiO <sub>2</sub> (substrate)   | 5.082 | 5.082 | 7.095  | 01-086-1561 |
| Cr <sub>2</sub> O <sub>3</sub> | 4.958 | 4.958 | 13.593 | 00-006-0504 |
| Cr <sub>3</sub> O              | 4.544 | 4.544 | 4.544  | 01-072-0528 |

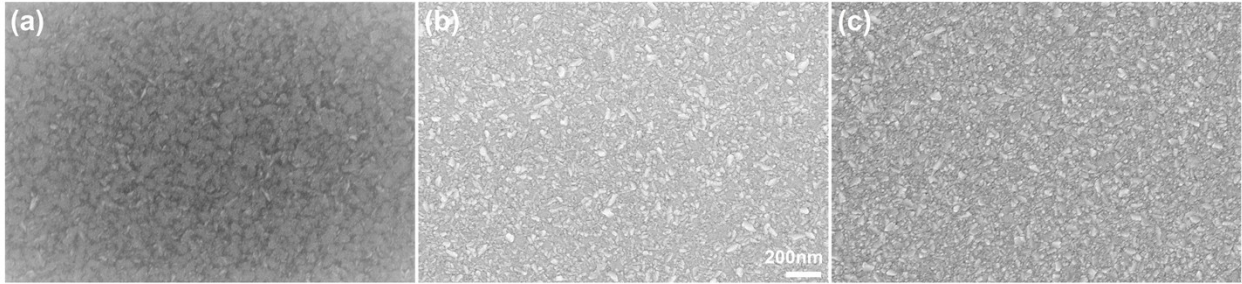

**Fig. S1.** FE-SEM micrographs of (a) 5 nm (b) 10 nm and (c) 20nm treated Cr evaporated layer.

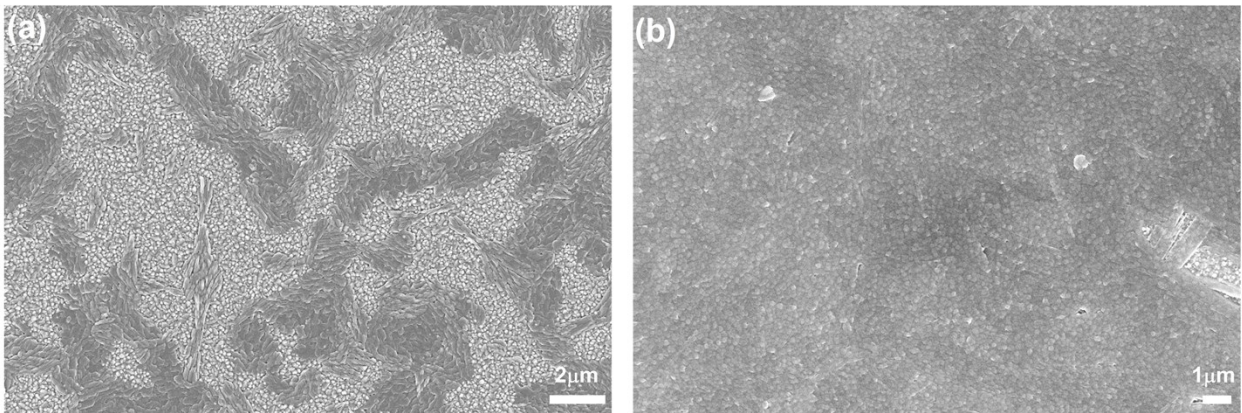

**Fig. S2.** FE-SEM micrographs of (a) 40 nm and (b) 100 nm evaporated MoO<sub>3</sub> seed layer on FTO substrates.

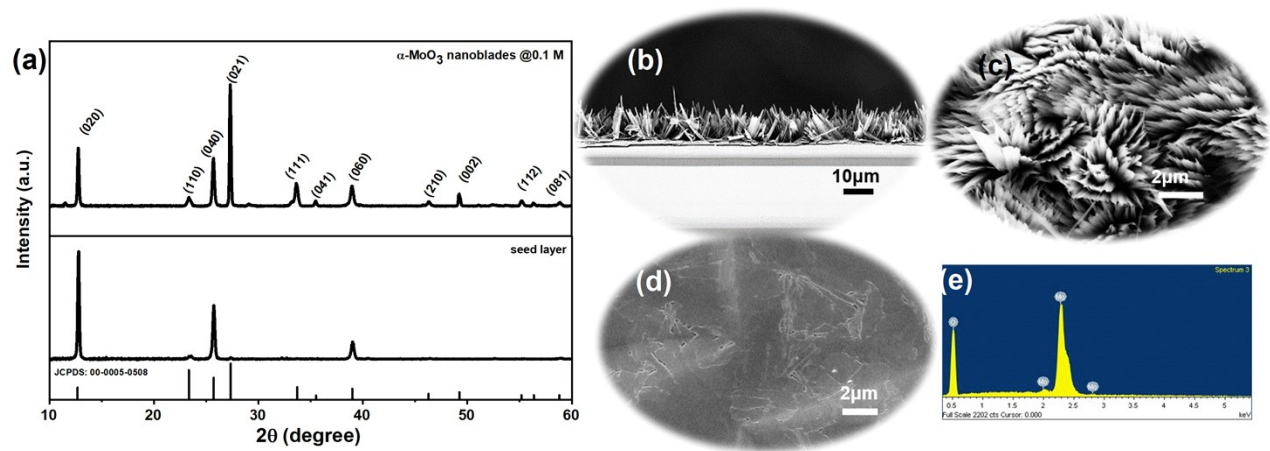

**Fig. S3.** (a) XRD patterns of seed layer and vertically aligned  $\alpha$ - $\text{MoO}_3$  nanoblades on Si/SiO<sub>2</sub> substrate. FE-SEM images of (b) seed layer, (c) cross-section, (d) top view of vertically aligned  $\alpha$ - $\text{MoO}_3$  nanoblades on Si/SiO<sub>2</sub> substrate and (e) EDX elemental peaks of the vertically aligned  $\alpha$ - $\text{MoO}_3$  nanoblades

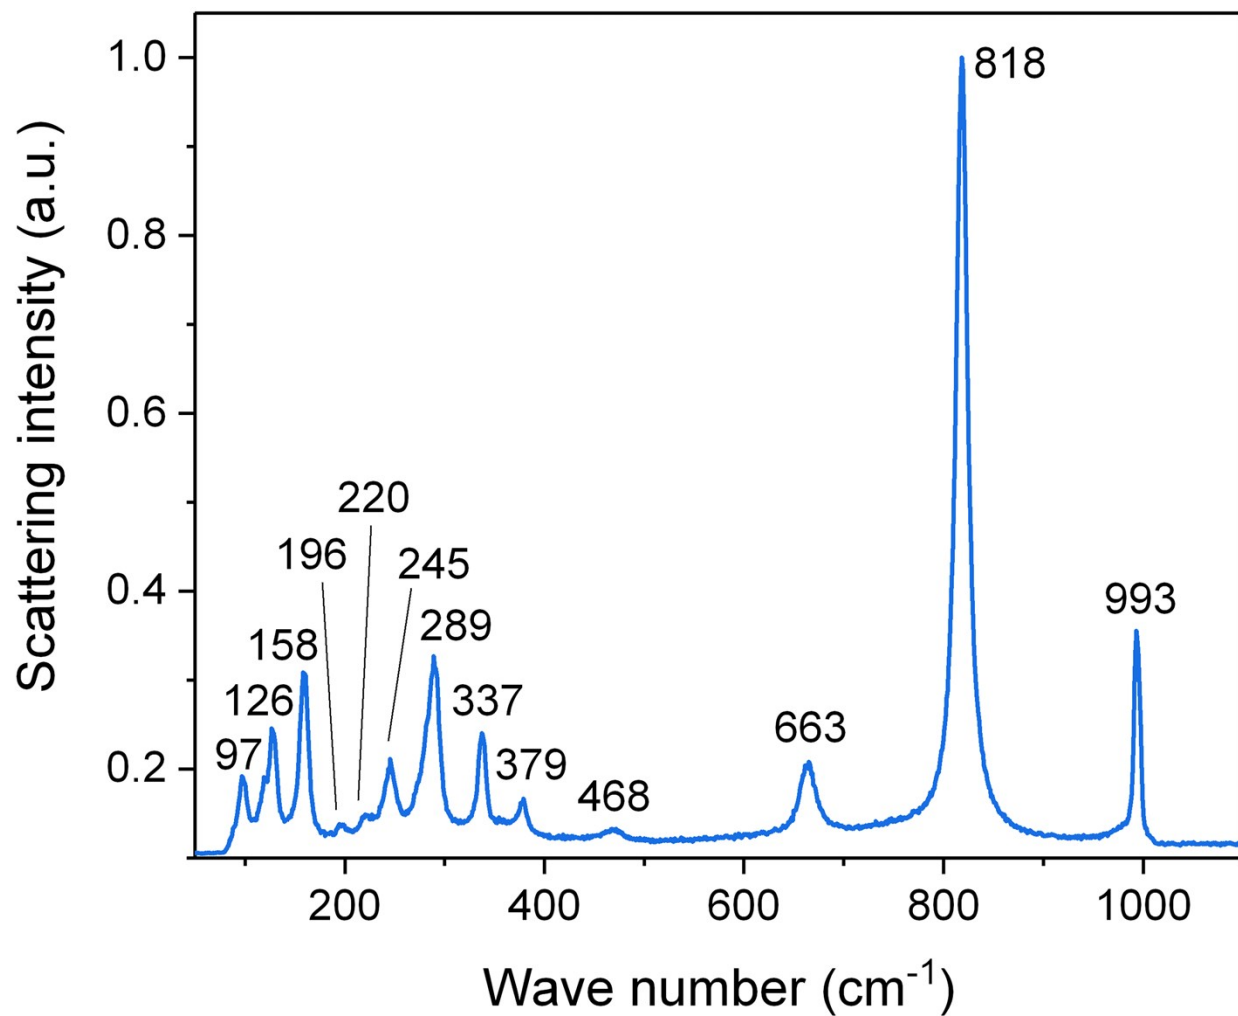

**Fig. S4.** Raman spectrum of the vertically aligned  $\alpha$ -MoO<sub>3</sub> nanoblades recorded using a laser wavelength of 488 nm.

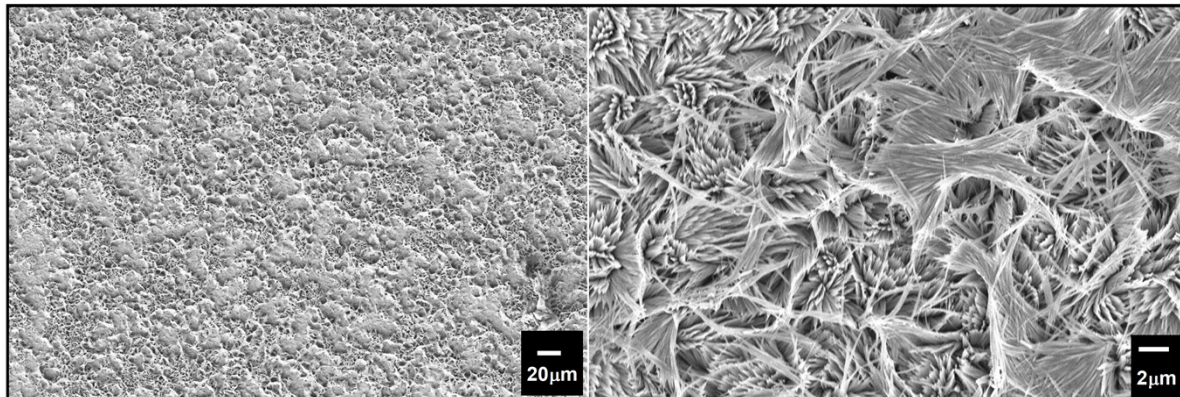

**Fig. S5.** FE-SEM micrographs show the overgrowth of the vertically aligned  $\alpha$ - $\text{MoO}_3$  nanoblades due to an increased hydrothermal reaction time of 4h (using acid concentration of 0.3 mol/L).

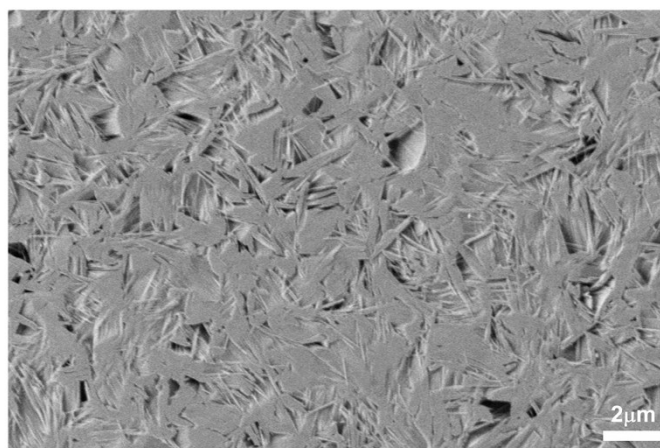

**Fig. S6.** FE-SEM micrograph of backside of the vertically aligned  $\alpha$ - $\text{MoO}_3$  nanoblades after removal from the substrate.

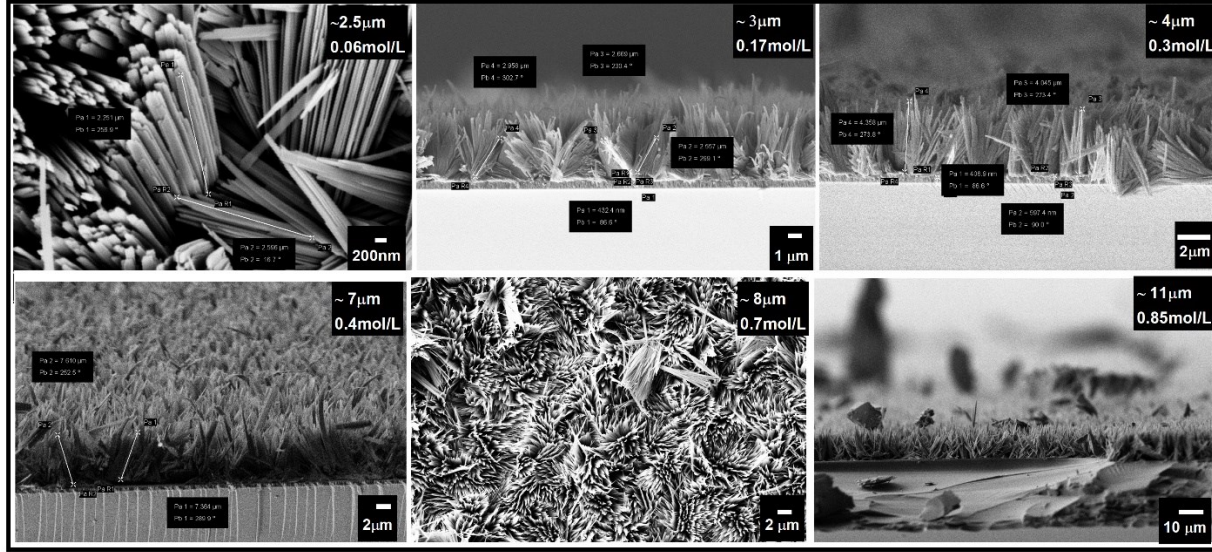

**Fig. S7.** FE-SEM micrographs show the growth of the vertically aligned  $\alpha$ - $\text{MoO}_3$  nanoblades via different acid concentrations on seed layer of 10/100 nm of Cr/ $\text{MoO}_3$ .

**Table 2.** The obtained vertically aligned  $\alpha$ - $\text{MoO}_3$  nanoblade’s length corresponding to the used Acid concentration.

| Acid concentration (mol/L) | Vertically aligned $\alpha$ - $\text{MoO}_3$ nanoblade’s length( $\mu\text{m}$ ) |
|----------------------------|----------------------------------------------------------------------------------|
| 0.06                       | ~ 2.5                                                                            |
| 0.17                       | ~ 3                                                                              |
| 0.3                        | ~ 4                                                                              |
| 0.4                        | ~ 7                                                                              |
| 0.7                        | ~ 8                                                                              |
| 0.85                       | ~ 11                                                                             |
